# Supplementary material for: Human click-based echolocation: Effects of blindness and age, and real-life implications in a 10-week training program
Source: PLoS One. 2021 Jun 2;16(6):e0252330. doi: 10.1371/journal.pone.0252330 (PMC8171922; doi:10.1371/journal.pone.0252330)
Supplement: S1 Data — Each row contains data for one participant. Column headings indicate which data are shown. (XLSX) [file pone.0252330.s001.xlsx]

## Sheet: all_behav_data
group	sex	age	dfm2000	dfm500	dci2000	dci500	Avg_abs_delta_bin_8k	avg_hl_8k	L250	L500	L1000	L2000	L4000	L8000	R250	R500	R1000	R2000	R4000	R8000	dist_ori1	dist_ori2	dist_ori3	dist_ori4	dist_ori5	dist_ori6	dist_ori7	dist_ori8	dist_ori9	dist_ori10	dist_ori11	dist_ori12	dist_ori13	dist_ori14	dist_ori15	dist_ori16	dist_ori17	dist_ori18	dist_ori19	dist_ori20	acc_ori1	acc_ori2	acc_ori3	acc_ori4	acc_ori5	acc_ori6	acc_ori7	acc_ori8	acc_ori9
sighted	M	21	0.185185	0.222222	0.111111	0.518519	4.16667	-2.08333	0	0	-5	-5	-10	-5	5	10	-5	-5	-5	0	33	33	33	33	33	33	33	33	33	33	33	33	33	33	33	33	33	33	33	33	0.166667	0.333333	0.25	0.291667	0.25	0.333333	0.583333	0.541667	0.458333
sighted	M	21	0.740741	0.222222	0.703704	0.925926	4.16667	1.25	5	5	5	0	-5	-5	0	5	0	5	-5	5	33	33	33	33	33	33	33	33	33	33	33	33	33	33	66	66	66	66	66	66	0.458333	0.666667	0.625	0.666667	0.666667	0.708333	0.791667	0.75	0.791667
sighted	F	24	0.592593	0.592593	0.148148	0.444444	4.16667	3.75	5	10	5	0	-10	0	5	15	10	5	-5	5	33	33	33	33	33	33	33	33	33	33	33	33	33	33	33	33	33	33	33	33	0.333333	0.541667	0.541667	0.625	0.625	0.708333	0.75	0.666667	0.625
sighted	M	23	0.481481	0.37037	0.37037	0.518519	4.16667	9.58333	15	15	10	15	5	0	10	15	15	5	5	5	33	33	33	33	33	33	33	33	33	33	33	33	33	33	33	33	33	33	33	33	0.333333	0.458333	0.458333	0.5	0.541667	0.666667	0.666667	0.666667	0.833333
sighted	F	22	0.481481	-0.0740741	0.37037	0.37037	4.16667	2.08333	0	10	10	0	5	-10	0	5	10	-10	5	0	33	33	33	33	33	33	66	66	66	66	66	99	99	99	99	99	99	99	99	99	0.625	0.25	0.666667	0.708333	0.916667	0.958333	0.375	0.791667	0.791667
sighted	M	25	#NULL!	#NULL!	#NULL!	#NULL!	6.66667	1.66667	0	0	0	-10	0	5	-5	5	0	5	10	10	33	33	33	33	33	33	33	33	33	33	33	33	33	33	33	33	33	33	33	66	0.625	0.583333	0.708333	0.541667	0.666667	0.625	0.625	0.583333	0.625
sighted	F	22	0.481481	0.407407	0.555556	0.037037	#NULL!	#NULL!	#NULL!	#NULL!	#NULL!	#NULL!	#NULL!	#NULL!	#NULL!	#NULL!	#NULL!	#NULL!	#NULL!	#NULL!	33	33	33	33	33	33	33	33	33	33	66	66	66	66	66	66	66	66	66	66	0.166667	0.458333	0.5	0.25	0.708333	0.875	0.875	0.875	0.916667
sighted	M	60	0.592593	0	0.296296	0.814815	3.33333	8.33333	5	5	0	0	10	30	0	10	0	0	15	25	33	33	33	33	33	33	33	33	33	33	33	33	33	33	33	33	33	33	33	33	0.291667	0.25	0.333333	0.625	0.5	0.541667	0.583333	0.625	0.583333
sighted	F	48	0.481481	0.407407	0.0740741	0.148148	5	2.5	0	5	5	-5	5	-5	5	10	5	0	0	5	33	33	33	33	33	33	33	33	33	33	33	33	33	33	33	33	33	33	33	33	0.333333	0.5	0.375	0.291667	0.333333	0.416667	0.333333	0.5	0.416667
sighted	F	38	0.777778	0.407407	0.814815	0.888889	7.5	-3.75	5	-10	-10	-5	-5	5	-10	-5	-5	-5	5	-5	33	33	33	33	33	33	33	33	33	33	33	66	66	66	66	66	66	66	66	66	0.125	0.375	0.875	0.458333	0.5	0.625	0.625	0.666667	0.625
sighted	M	32	0.592593	0.518519	0.481481	0.851852	5.83333	1.25	5	5	5	-5	-5	10	0	5	0	0	0	-5	33	33	33	33	33	33	33	33	33	33	33	33	33	33	33	33	33	33	33	33	0.541667	0.375	0.25	0.375	0.333333	0.541667	0.333333	0.375	0.375
sighted	F	71	0.592593	-0.037037	0.592593	0.888889	13.3333	39.1667	30	30	25	20	60	90	20	25	30	35	35	70	33	33	33	33	33	33	33	33	33	33	33	33	33	33	33	33	33	33	33	33	0.0416667	0.291667	0.5	0.333333	0.541667	0.583333	0.541667	0.5	0.666667
sighted	M	35	0.62963	0.62963	0.666667	0.740741	4.16667	-1.25	-10	0	-5	0	15	-10	-5	0	-5	-10	20	-5	33	33	33	66	66	66	99	99	99	99	99	132	132	132	132	132	132	132	132	132	0.833333	0.958333	0.958333	0.708333	0.916667	1	0.5	0.541667	0.75
sighted	M	27	0.407407	0.518519	0.222222	0.148148	3.33333	5	0	5	10	10	10	0	5	5	5	5	5	0	33	33	33	66	66	66	99	99	99	132	132	132	165	165	165	165	165	198	198	231	0.75	0.916667	1	0.708333	1	0.958333	0.708333	0.916667	0.958333
blind	F	60	0.37037	0.222222	2e-17	0.740741	5.83333	5.41667	0	5	5	10	15	-5	5	10	0	5	10	5	33	33	33	33	66	66	99	99	99	99	99	99	99	132	132	132	132	132	132	132	0.416667	0.875	1	1	1	1	0.833333	0.833333	0.833333
blind	M	54	0.703704	0.111111	0	0.555556	3.33333	5	-5	0	5	0	15	10	-5	5	10	5	15	5	33	33	33	33	33	33	33	33	33	33	33	33	33	33	33	33	33	33	33	66	0.375	0.333333	0.333333	0.25	0.583333	0.583333	0.833333	0.833333	0.5
blind	M	39	0.740741	0.407407	0	0.62963	3.33333	5	5	15	10	0	5	-5	5	10	5	0	5	5	33	33	33	33	33	33	33	33	33	33	33	33	66	66	66	66	66	66	66	66	0.375	0.541667	0.583333	0.541667	0.75	0.75	0.75	0.625	0.875
blind	M	46	0.740741	0.296296	0.555556	0.518519	5	2.5	-10	-5	-5	0	10	25	-5	0	0	0	-5	25	33	33	33	33	33	33	33	33	33	33	33	33	33	33	66	66	66	66	66	66	0.375	0.666667	0.583333	0.666667	0.625	0.75	0.875	0.791667	0.833333
blind	F	36	0.555556	0.0740741	0.296296	0.703704	5	9.16667	10	20	10	0	15	10	5	15	5	0	20	0	33	33	33	33	33	33	33	33	33	33	33	33	33	33	33	33	33	33	33	33	0.333333	0.25	0.375	0.375	0.541667	0.708333	0.5	0.541667	0.541667
blind	M	37	0.518519	0.407407	0.222222	0.296296	4.16667	0.416667	0	10	0	-5	-10	5	0	5	5	-5	0	0	33	33	33	33	33	33	33	33	33	33	33	33	33	33	33	33	33	33	33	33	0.0833333	0.25	0.25	0.333333	0.291667	0.208333	0.291667	0.458333	0.333333
blind	M	48	0.259259	0.0740741	0.777778	0.703704	4.16667	15.4167	5	10	10	15	25	30	15	10	10	5	20	30	33	33	33	33	33	33	33	33	33	33	33	33	33	33	33	33	33	33	33	33	0.583333	0.291667	0.458333	0.208333	0.166667	0.166667	0.416667	0.291667	0.291667
blind	F	72	0.296296	0.185185	0.333333	0.888889	10	44.5455	20	35	30	55	50	70	35	45	35	50	65	#NULL!	33	33	33	33	33	33	33	33	33	33	33	33	33	33	33	33	33	33	33	33	0.3125	0.5	0.1875	0.5	0.291667	0.208333	0.1875	0.5	0.3125
blind	F	79	0.0740741	0.222222	0.518519	0.407407	13.3333	39.1667	20	30	30	50	65	80	5	20	25	35	45	65	33	33	33	33	33	33	33	33	33	33	33	33	33	33	33	33	33	33	33	33	0.3125	0.5625	0.1875	0.25	0.541667	0.125	0.416667	0.458333	0.3125
blind	F	44	0.62963	0.296296	0.37037	0.555556	5	0.833333	-5	0	0	5	5	0	-10	0	5	0	0	10	33	33	33	33	33	33	33	33	33	33	66	66	66	66	66	99	99	99	99	99	0.541667	0.5	0.625	0.875	0.833333	0.875	0.75	0.833333	0.958333
blind	F	27	0.592593	0.37037	0.0740741	0.592593	7.5	17.0833	20	30	20	10	0	5	15	30	25	10	10	30	33	33	33	33	33	33	33	33	33	33	33	33	33	33	33	33	33	33	33	33	0.291667	0.166667	0.125	0.458333	0.333333	0.333333	0.25	0.25	0.291667
blind	M	38	-0.222222	-0.407407	0.0740741	0.333333	10.8333	15.4167	10	10	-10	0	35	30	15	10	0	30	20	35	33	33	33	33	33	33	33	33	33	33	33	33	33	33	33	33	33	33	33	33	0.333333	0.5	0.166667	0.208333	0.3125	0.3125	0.3125	0.125	0.375
expert	M	#NULL!	#NULL!	#NULL!	#NULL!	#NULL!	#NULL!	#NULL!	#NULL!	#NULL!	#NULL!	#NULL!	#NULL!	#NULL!	#NULL!	#NULL!	#NULL!	#NULL!	#NULL!	#NULL!	#NULL!	#NULL!	#NULL!	#NULL!	#NULL!	#NULL!	#NULL!	#NULL!	#NULL!	#NULL!	#NULL!	#NULL!	#NULL!	#NULL!	#NULL!	#NULL!	#NULL!	#NULL!	#NULL!	99	#NULL!	#NULL!	#NULL!	#NULL!	#NULL!	#NULL!	#NULL!	#NULL!	#NULL!
expert	M	#NULL!	#NULL!	#NULL!	#NULL!	#NULL!	#NULL!	#NULL!	#NULL!	#NULL!	#NULL!	#NULL!	#NULL!	#NULL!	#NULL!	#NULL!	#NULL!	#NULL!	#NULL!	#NULL!	#NULL!	#NULL!	#NULL!	#NULL!	#NULL!	#NULL!	#NULL!	#NULL!	#NULL!	#NULL!	#NULL!	#NULL!	#NULL!	#NULL!	#NULL!	#NULL!	#NULL!	#NULL!	#NULL!	99	#NULL!	#NULL!	#NULL!	#NULL!	#NULL!	#NULL!	#NULL!	#NULL!	#NULL!
expert	M	#NULL!	#NULL!	#NULL!	#NULL!	#NULL!	#NULL!	#NULL!	#NULL!	#NULL!	#NULL!	#NULL!	#NULL!	#NULL!	#NULL!	#NULL!	#NULL!	#NULL!	#NULL!	#NULL!	#NULL!	#NULL!	#NULL!	#NULL!	#NULL!	#NULL!	#NULL!	#NULL!	#NULL!	#NULL!	#NULL!	#NULL!	#NULL!	#NULL!	#NULL!	#NULL!	#NULL!	#NULL!	#NULL!	99	#NULL!	#NULL!	#NULL!	#NULL!	#NULL!	#NULL!	#NULL!	#NULL!	#NULL!
expert	F	#NULL!	#NULL!	#NULL!	#NULL!	#NULL!	#NULL!	#NULL!	#NULL!	#NULL!	#NULL!	#NULL!	#NULL!	#NULL!	#NULL!	#NULL!	#NULL!	#NULL!	#NULL!	#NULL!	#NULL!	#NULL!	#NULL!	#NULL!	#NULL!	#NULL!	#NULL!	#NULL!	#NULL!	#NULL!	#NULL!	#NULL!	#NULL!	#NULL!	#NULL!	#NULL!	#NULL!	#NULL!	#NULL!	99	#NULL!	#NULL!	#NULL!	#NULL!	#NULL!	#NULL!	#NULL!	#NULL!	#NULL!
expert	M	#NULL!	#NULL!	#NULL!	#NULL!	#NULL!	#NULL!	#NULL!	#NULL!	#NULL!	#NULL!	#NULL!	#NULL!	#NULL!	#NULL!	#NULL!	#NULL!	#NULL!	#NULL!	#NULL!	#NULL!	#NULL!	#NULL!	#NULL!	#NULL!	#NULL!	#NULL!	#NULL!	#NULL!	#NULL!	#NULL!	#NULL!	#NULL!	#NULL!	#NULL!	#NULL!	#NULL!	#NULL!	#NULL!	99	#NULL!	#NULL!	#NULL!	#NULL!	#NULL!	#NULL!	#NULL!	#NULL!	#NULL!
expert	M	#NULL!	#NULL!	#NULL!	#NULL!	#NULL!	#NULL!	#NULL!	#NULL!	#NULL!	#NULL!	#NULL!	#NULL!	#NULL!	#NULL!	#NULL!	#NULL!	#NULL!	#NULL!	#NULL!	#NULL!	#NULL!	#NULL!	#NULL!	#NULL!	#NULL!	#NULL!	#NULL!	#NULL!	#NULL!	#NULL!	#NULL!	#NULL!	#NULL!	#NULL!	#NULL!	#NULL!	#NULL!	#NULL!	#NULL!	#NULL!	#NULL!	#NULL!	#NULL!	#NULL!	#NULL!	#NULL!	#NULL!	#NULL!
expert	M	#NULL!	#NULL!	#NULL!	#NULL!	#NULL!	#NULL!	#NULL!	#NULL!	#NULL!	#NULL!	#NULL!	#NULL!	#NULL!	#NULL!	#NULL!	#NULL!	#NULL!	#NULL!	#NULL!	#NULL!	#NULL!	#NULL!	#NULL!	#NULL!	#NULL!	#NULL!	#NULL!	#NULL!	#NULL!	#NULL!	#NULL!	#NULL!	#NULL!	#NULL!	#NULL!	#NULL!	#NULL!	#NULL!	#NULL!	#NULL!	#NULL!	#NULL!	#NULL!	#NULL!	#NULL!	#NULL!	#NULL!	#NULL!
expert	M	#NULL!	#NULL!	#NULL!	#NULL!	#NULL!	#NULL!	#NULL!	#NULL!	#NULL!	#NULL!	#NULL!	#NULL!	#NULL!	#NULL!	#NULL!	#NULL!	#NULL!	#NULL!	#NULL!	#NULL!	#NULL!	#NULL!	#NULL!	#NULL!	#NULL!	#NULL!	#NULL!	#NULL!	#NULL!	#NULL!	#NULL!	#NULL!	#NULL!	#NULL!	#NULL!	#NULL!	#NULL!	#NULL!	#NULL!	#NULL!	#NULL!	#NULL!	#NULL!	#NULL!	#NULL!	#NULL!	#NULL!	#NULL!
[truncated: 150 more columns]
